# Supplementary material
Source: bioRxiv or medRxiv preprint supplement (https://www.biorxiv.org/highwire/filestream/130491/field_highwire_adjunct_files/2/434654-11.pdf)
Supplement: Supplementary file [file 434654-11.pdf]

1 **Table S10.** Statistics of the “Physical data only” model (i.e.  $\log(R_H)$  as a function of  
 2 temperature, moisture and their interaction).  $P < 0.05$ ,  $BIC=97.5$ . Significance codes:  $0.001 <$   
 3  $P < 0.01$  '\*\*\*',  $0.01 < P < 0.05$  '\*'.

|               | <b>Estimate</b> | <b>Std. Error</b> | <b>t-value</b> | <b>P</b> |
|---------------|-----------------|-------------------|----------------|----------|
| (Intercept)   | - 1.79150       | 0.77527           | - 2.311        | 0.024*   |
| Temp          | 0.11220         | 0.03638           | 3.084          | 0.003**  |
| Moisture      | 4.76517         | 7.24060           | 0.658          | 0.513    |
| Temp:Moisture | - 0.21880       | 0.34916           | - 0.627        | 0.533    |
